# Supplementary material for: Magnetic Fe/Fe3C@C Nanoadsorbents for Efficient Cr (VI) Removal
Source: MDPI journal article supplement (doi:10.3390/ijms232315135), 2022-12-01
Supplement: s1 [file s1]

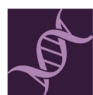

Supplementary materials

# Magnetic carbon nanocomposites from Fe<sub>3</sub>O<sub>4</sub> reduction and their application as Cr (VI) adsorbents

Laura Cervera-Gabalda <sup>1,2</sup> and Cristina Gómez-Polo <sup>1,2,\*</sup>

<sup>1</sup> Departamento de Ciencias, Universidad Pública de Navarra, Campus de Arrosadia, 31006 Pamplona, Spain

<sup>2</sup> Institute for Advanced Materials and Mathematics (INAMAT2), Universidad Pública de Navarra, Campus de Arrosadia, 31006, Pamplona, Spain

\* Correspondence: gpolo@unavarra.es; Tel.: +34-948169576

## Supplementary Figures

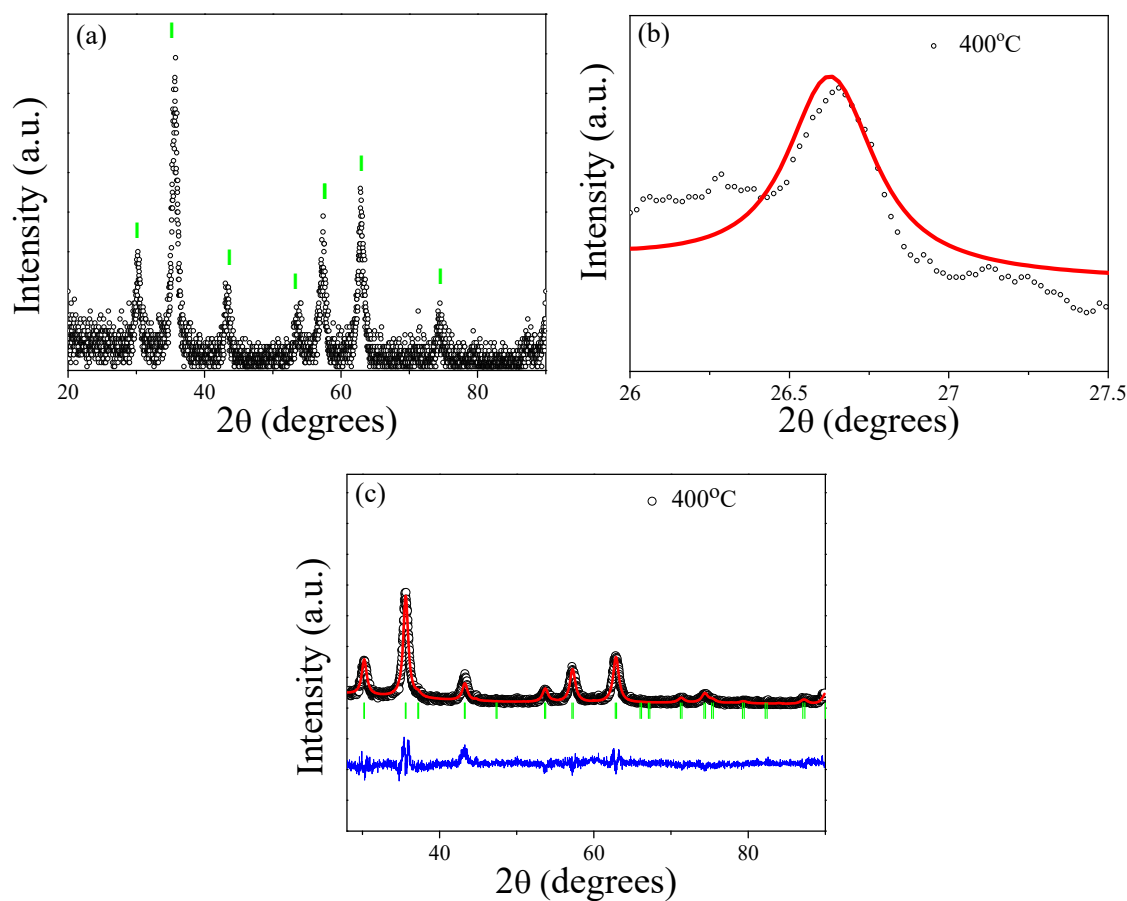

**Figure S1.** XRD patterns for the (a) Fe<sub>3</sub>O<sub>4</sub> initial MNPs and (b,c) MNPs + fructose sample at  $T_{ann} = 400^{\circ}\text{C}$ : (o) Experimental, (—) calculated (Rietveld refinement) intensities and (—) difference between both intensities. The Bragg reflections are shown for (|) Fe<sub>3</sub>O<sub>4</sub>.

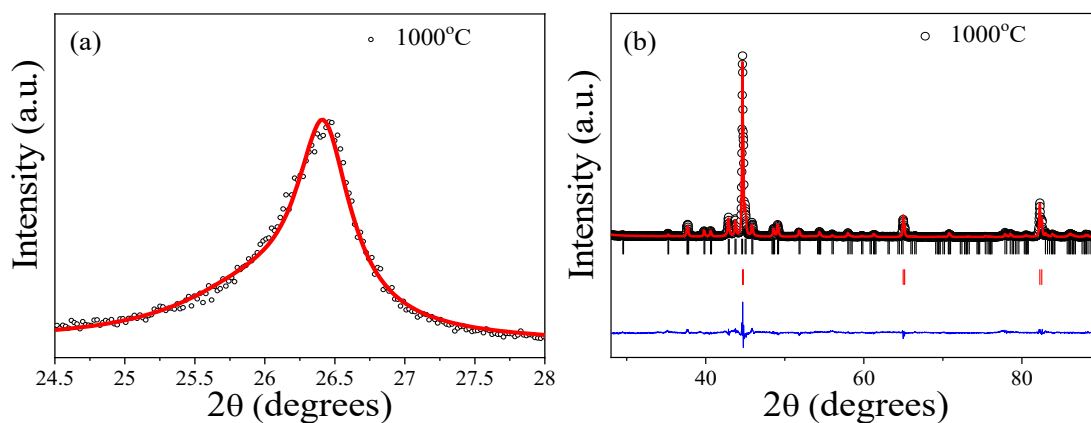

**Figure S2.** XRD patterns for the MNPs + fructose sample annealed at  $T_{ann} = 1000^{\circ}\text{C}$ . (o) Experimental, (—) calculated (Rietveld refinement) intensities and (—) difference between both intensities. The Bragg reflections are shown for (|)  $\text{Fe}_3\text{C}$  and (|)  $\alpha\text{-Fe}$ .

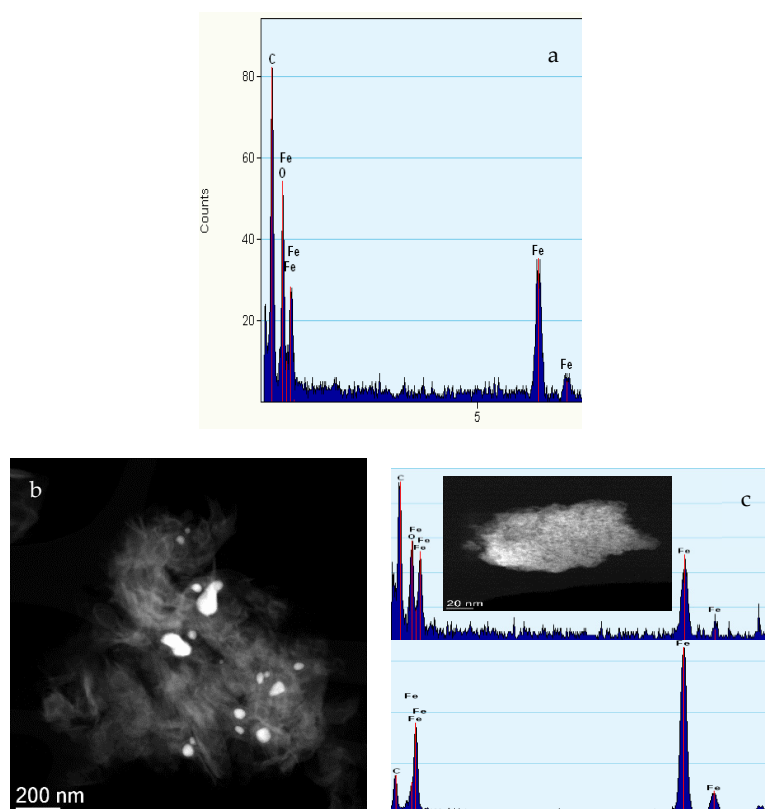

**Figure S3.** (a,c) EDX analysis for the MNPs + fructose sample annealed at  $T_{ann} = 400$  and  $600^{\circ}\text{C}$ , respectively. (b) STEM image of the MNPs + fructose sample annealed at  $T_{ann} = 600^{\circ}\text{C}$ .

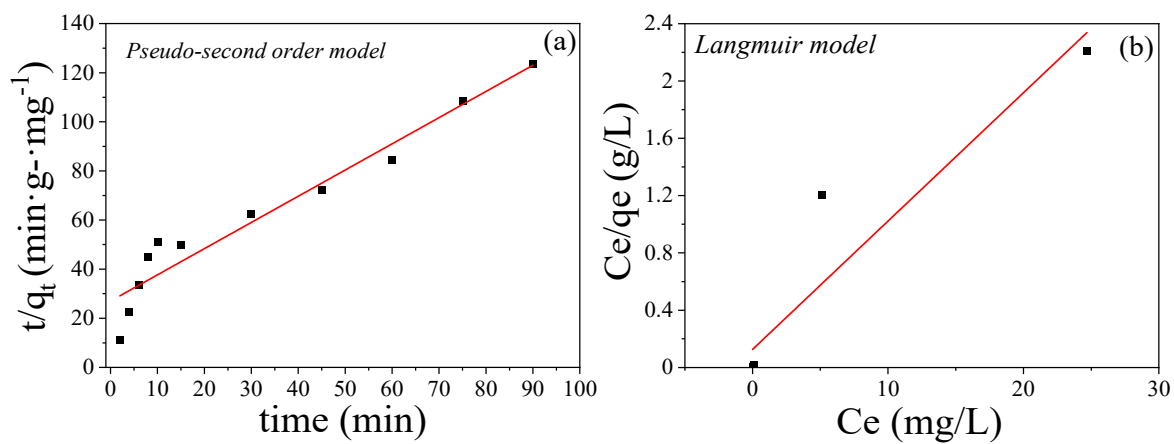

**Figure S4.** (a) Adsorption kinetics of Cr(VI) and (b) adsorption isotherms in the presence of the initial Fe<sub>3</sub>O<sub>4</sub> MNPs.
